# Supplementary material for: Systematic characterization of gene function in the photosynthetic alga Chlamydomonas reinhardtii
Source: PubMed Central journal article supplement (PMC9110296; doi:10.1038/s41588-022-01052-9), 2022-05-05
Supplement: 41588_2022_1052_MOESM8_ESM.pdf [file 41588_2022_1052_MOESM8_ESM.pdf]

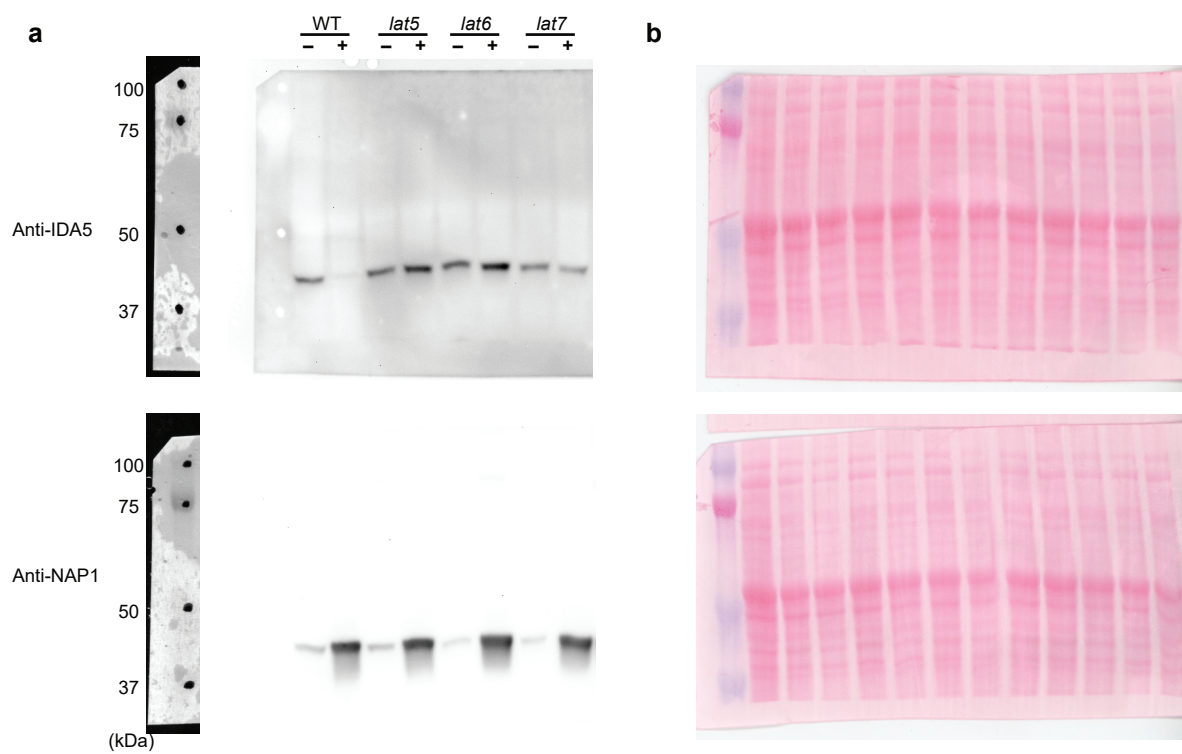

**Source Data Figure 5**

a, Uncropped immunoblot of conventional (IDA5) and alternative (NAP1) actins found in Figure 5e.

b, Uncropped Ponceau stain found in Figure 5e.
